## Enhancing CRISPR deletion via pharmacological delay of DNA-PK

1  
2  
3  
4  
5  
6  
7  
8  
9  
10  
11  
12  
13  
14  
15  
16  
17  
18  
19  
20  
21  
22  
23  
24  
25

*Núria Bosch (1,2,4),*

*Michaela Medová (2,3),*

*Roberta Esposito (1,2),*

*Carlos Pulido-Quetglas (1,2,4)*

*Yitzhak Zimmer (2,3),*

*Rory Johnson\* (1,2)*

1. Department of Medical Oncology, Inselspital, Bern University Hospital, University of Bern, Switzerland

2. Department for BioMedical Research, University of Bern, Bern, Switzerland

3. Department of Radiation Oncology, Inselspital, Bern University Hospital, University of Bern, Switzerland

4. Graduate School of Cellular and Biomedical Sciences, University of Bern, Bern, Switzerland

\*Correspondence: [rory.johnson@dbmr.unibe.ch](mailto:rory.johnson@dbmr.unibe.ch)

26 **Abstract**

27 **CRISPR-Cas9 deletion (CRISPR-del) is the leading approach for eliminating DNA from mammalian**  
28 **cells and underpins a variety of genome-editing applications. Target DNA, defined by a pair of double**  
29 **strand breaks (DSBs), is removed during non-homologous end-joining (NHEJ). However, the low**  
30 **efficiency of CRISPR-del results in laborious experiments and false negative results. Using an**  
31 **endogenous reporter system, we demonstrate that temporary inhibition of DNA-dependent protein**  
32 **kinase (DNA-PK) – an early step in NHEJ - yields up to 17-fold increase in DNA deletion. This is**  
33 **observed across diverse cell lines, gene delivery methods, commercial inhibitors and guide RNAs,**  
34 **including those that otherwise display negligible activity. Importantly, the method is compatible with**  
35 **pooled functional screens employing lentivirally-delivered guide RNAs. Thus, delaying the kinetics of**  
36 **NHEJ relative to DSB formation is a simple and effective means of enhancing CRISPR-deletion.**

37  
38 **Keywords: CRISPR; CRISPR deletion ; DNA-PK ; genome editing ; reporter assay; DNA.**

39  
40  
41

42 **Introduction**

43 CRISPR-Cas9 technology enables a variety of loss-of-function perturbations to study the functions of  
44 genomic elements in their natural context, and engineer natural and unnatural mutations (Cong et al. 2013;  
45 Mali et al. 2013; Doench 2017). One such application, CRISPR-deletion (CRISPR-del), is a means of  
46 permanently removing specific genomic fragments from  $10^1 - 10^6$  base pairs (Canver et al. 2014). This range  
47 has enabled researchers to investigate a wide variety of functional elements, including gene regulatory  
48 sequences (Canver et al. 2015; Mochizuki et al. 2018; Gasperini et al. 2019), non-coding RNAs (Han et al.  
49 2014; Ho et al. 2015; Holdt et al. 2016; Koirala et al. 2017; Xing et al. 2017), and structural elements (Huang  
50 et al. 2018). Similarly, engineered deletions can be used to model human mutations (Lupiañez et al. 2015;  
51 Nelson et al. 2016). CRISPR-del is readily scaled to high throughput screens, via pooled lentiviral libraries  
52 of thousands of paired single guide RNAs (sgRNAs) (Vidigal and Ventura 2015; Aparicio-Prat et al. 2015).

53 This has been used to discover long noncoding RNAs (lncRNAs) regulating cancer cell proliferation (Zhu et  
54 al. 2016; Liu et al. 2018) and to map *cis*-regulatory regions of key protein-coding genes (Gasparini et al.  
55 2017; Diao et al. 2017).

56 CRISPR-del employs a pair of CRISPR-Cas9 complexes to introduce double strand breaks (DSBs) at two  
57 sites flanking the target region. Thereafter it relies on the endogenous non-homologous end joining (NHEJ)  
58 process to repair the breaks so as to eject the intervening fragment (Yang et al. 2013; Maddalo et al. 2014;  
59 Ho et al. 2015; Vidigal and Ventura 2015). The two ends of target regions are defined by a pair of user-  
60 designed sgRNAs (Pulido-Quetglas et al. 2017). Paired sgRNAs may be delivered by transfection or viral  
61 transduction (Vidigal and Ventura 2015; Aparicio-Prat et al. 2015). Pooled screens require that both sgRNAs  
62 are encoded in a single vector to ensure their simultaneous delivery, and are typically performed under  
63 conditions of low multiplicity-of-infection (MOI), where each cell carries a single lentiviral insertion  
64 (Vidigal and Ventura 2015; Zhu et al. 2016; Gasparini et al. 2017; Esposito et al. 2019; Doench 2018).

65 The principal drawback of CRISPR-del is the low efficiency with which targeted alleles are deleted. Studies  
66 on cultured cells typically report efficiencies in the range 0% – 50% of alleles, and often <20% (Mandal et  
67 al. 2014; Thomas et al. 2020), similar to estimates from individual clones (Canver et al. 2014; Vidigal and  
68 Ventura 2015; Aparicio-Prat et al. 2015; Ho et al. 2015; Pulido-Quetglas et al. 2017). Indeed, a recent  
69 publication reported high variation in the efficiencies of paired sgRNA targeting the same region, including  
70 many that yielded negligible deletion (Thomas et al. 2020). Transfection typically yields greater efficiency  
71 than viral transduction, possibly due to higher sgRNA levels (Mangeot et al. 2019), but is incompatible with  
72 pooled screening. Although megabase-scale deletions have been reported (Han et al. 2014; Essletzbichler et  
73 al. 2014), deletion efficiency decreases with increasing target size (Canver et al. 2014). Homozygous  
74 knockout clones may be isolated by screening hundreds of single cells, however this is slow and laborious,  
75 and resulting clones may not be representative of the general population (Stojic et al. 2018). More important  
76 than these practical costs, is the potential impact of low deletion rates on the ability to discern *bona fide*  
77 functional effects arising from a given mutation (Thomas et al. 2020). Non-performing sgRNA pairs are a  
78 particular problem for pooled CRISPR-del screens, where they reduce statistical power and lead to false  
79 negative results. In the screen reported by Zhu et al., less than half of sgRNAs yielded a detectable phenotype,  
80 strongly suggesting they do not efficiently delete their targets (Fig. 1A) (Zhu et al. 2016). Similar results are

81 reported by Canver et al, where 65% of pgRNAs yielded deletion efficiency <20% (Canver et al. 2014).  
82 There is no observable correlation between phenotype and average predicted score of the two sgRNAs (Fig.  
83 1B) (Zhu et al. 2016). This suggest that deletion efficiency of a given pgRNA does not simply depend on the  
84 aggregate quality of its two individual sgRNAs. The outcome is that researchers are forced to increase the  
85 coverage of deletion constructs per target, resulting in lower candidate numbers and increased costs (Doench  
86 et al. 2016; Sanson et al. 2018). Consequently, any method to improve CRISPR-del efficiency would  
87 streamline experiments and enable the discovery of presently-overlooked functional elements.

88 For other applications of CRISPR, most notably precise genome editing using homologous recombination  
89 (HR), substantial gains have been made editing efficiency (Yeh et al. 2019). Here, editing events are rare,  
90 and HR is the rate-limiting-step (Mao et al. 2008; Miyaoka et al. 2016). The two principal strategies to boost  
91 efficiency are: (1) direct stimulation of homology directed repair (HDR) (Riesenberg and Maricic 2018; Yeh  
92 et al. 2019; Song et al. 2016; Lin et al. 2014); (2) suppression of the competing NHEJ pathway at early stages  
93 through inhibition of Ku70/80 complex (Fattah et al. 2008; Riesenberg and Maricic 2018; Yeh et al. 2019)  
94 or DNA-dependent protein kinase (DNA-PK) (Robert et al. 2015; Riesenberg and Maricic 2018; Riesenberg  
95 et al. 2019; Yeh et al. 2019), or at late phases, via Ligase IV (LigIV) inhibition (Chu et al. 2015; Maruyama  
96 et al. 2015; Riesenberg and Maricic 2018; Yeh et al. 2019). To date, however, there are no reported methods  
97 for pharmacological enhancement of CRISPR-del.

98 Towards this aim, we consider the events necessary for successful deletion (Fig. 1C). In the presence of two  
99 DSBs, NHEJ gives rise to successful deletion. For this to occur, the DSBs must occur on a timescale shorter  
100 than that required for NHEJ. Otherwise, the first DSB is repaired by NHEJ *before* the second can occur, and  
101 deletion will not take place. Furthermore, there is a high probability that the target protospacer or protospacer  
102 adjacent motif (PAM) is mutated during NHEJ, rendering it inaccessible to the sgRNA and precluding any  
103 subsequent deletion (Canver et al. 2014).

104 A prediction of this model, is that successful deletion can be promoted by extending the time over which  
105 DSBs persist without being repaired, and hence increasing the likelihood that both DSBs co-occur. In other  
106 words, we hypothesise that CRISPR-del may be improved by pharmacologically slowing the rate of NHEJ  
107 during the period while DSBs are taking place. Here, we show that inhibition of DNA-PK, an early step in

108 NHEJ, indeed improves CRISPR-del efficiency, regardless of cell type, target region, sgRNA or inhibitory  
 109 molecule, and represents a practical strategy for a variety of applications including pooled library screening.

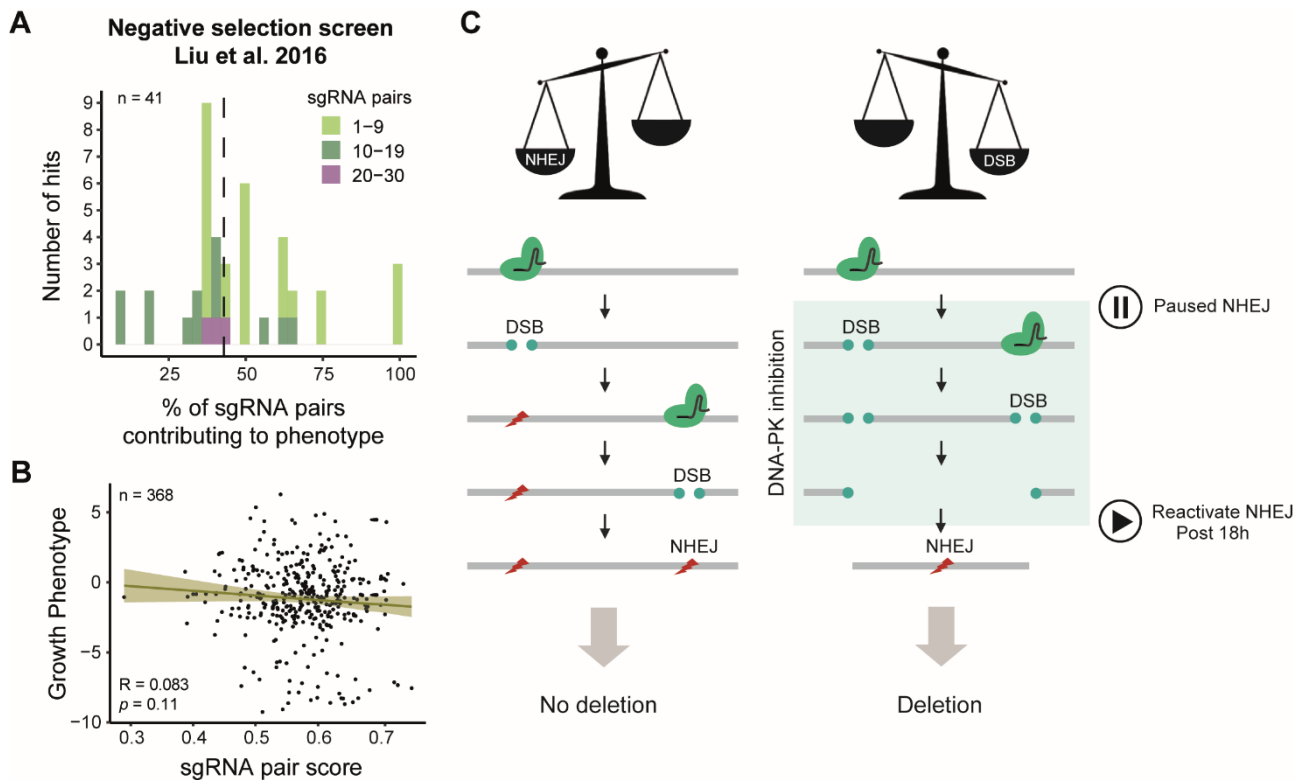

**Figure 1. Analysis of sgRNA pairs efficiencies from public data and CRISPR-deletion model.** (A, B), Re-analysis of the hits obtained CRISPR-del negative selection screen in Huh.7 cells from Zhu et al. 2016 (excluding hits targeting ORFs). (A) The upper histogram shows the percentage of sgRNA pairs contributing to the phenotype of each hit (x axis) versus the number of hits included in each bin (y axis). The dashed line represents the median (42.86%). Hits have been divided in three groups by the total number of sgRNAs designed (light green, dark green and purple). (B) The scatter plot represents the mean of the individual sgRNAs scores within a pair (calculated with the Rule Set II algorithm from Doench et al. 2016) versus the Log2 Fold Change (Growth Phenotype) obtained by Zhu et al. 2016. Pearson correlation ( $R$ ) and  $p$ -value ( $p$ ) are shown. (C) Model for CRISPR-del and its improvement by inhibition of DNA-PK.

110

111

## 112 Results

### 113 A quantitative endogenous reporter for CRISPR-del

114 To identify factors capable of improving CRISPR-del efficiency, we designed a gene-based reporter system:

115 CRISPR Deletion Endogenous Reporter (CiDER). Such a system should be quantitative, sensitive, practical

116 and able to closely model the CRISPR-del process by targeting endogenous genes rather than plasmids. We

117 focussed on genes encoding cell-surface proteins, as they can be rapidly and sensitively detected by flow  
118 cytometry (Bausch-Fluck et al. 2015). A number of candidates were considered with criteria of (1) non-  
119 essentiality for cell viability and proliferation (Luo et al. 2008; Meyers et al. 2017; Tsherniak et al. 2017)  
120 (<https://depmap.org>), (2) high expression in human cell lines (Thul et al. 2017) (<http://www.proteinatlas.org>),  
121 (3) lack of overlap with other genomic elements that could lead to false positive detection, and (4) availability  
122 of flow-cytometry grade antibody. Consequently, we selected *PLXND1* encoding the Plexin-D1 protein  
123 (Supplementary Fig. 1), which presents three genomic copies in HeLa cells and two in HCT116 cells  
124 according to the Cancer Cell Line Encyclopedia (CCLE) (Barretina et al. 2012)  
125 (<https://portals.broadinstitute.org/ccle/data>).

126 We conceived an experimental setup where only successful CRISPR-del leads to loss of *PLXND1* expression,  
127 but unsuccessful events do not. In this scheme, the gene's first exon is targeted for deletion by a series of  
128 sgRNA pairs recognising the non-protein coding regions upstream (promoter) and downstream (first intron)  
129 (Fig. 2A). Successful deletions of the first exon are expected to silence protein expression, but indels from  
130 individual sgRNAs do not affect the protein sequence directly and should not lead to silencing. Finally, we  
131 also designed sgRNAs that directly target the open reading frame (ORF), since these are expected to yield  
132 maximal protein silencing (designated positive control,  $P+$ ).

133 We used flow cytometry to evaluate Plexin-D1 protein levels (Fig. 2B). Positive control sgRNAs ( $P+$ )  
134 yielded approximately 90% knockout efficiency. We observed wide variability in the deletion efficiency of  
135 sgRNA pairs, from Pair1 ( $P1$ ) displaying minimal efficacy, to the most efficient  $P4$  yielding ~40% deletion.  
136 Therefore these paired sgRNAs achieve deletion efficiencies that are comparable to previous studies (Canver  
137 et al. 2014; Pulido-Quetglas et al. 2017). Measured deletion rates were consistent across biological replicates  
138 (Fig. 2B). The observed loss of Plexin-D1 was not due to large indels or disruption of gene regulatory  
139 elements at individual sgRNA target sites (Kosicki et al. 2018), since control experiments with single  
140 sgRNAs showed no loss of Plexin-D1 (Supplementary Fig. 2). In CiDER we have a reproducible and  
141 practical reporter of CRISPR-del at a range of efficiencies.

142

143

## 144 **Temporary inhibition of DNA-PK during DSB formation increases CRISPR-del efficiency**

145 We hypothesized that temporarily inhibiting NHEJ during DSB formation would favour CRISPR-del, by  
146 increasing the chance that both DSBs will co-occur (Fig. 1C). We tested DNA-PK, a DNA end-binding factor  
147 at the first step of NHEJ pathway, for which a number of small-molecule inhibitors are available (Harnor et  
148 al. 2017). We began by treating HeLa cells with the inhibitor M3814 ( $IC_{50}=3nM$ ) (Fuchss et al. 2014; Zenke  
149 et al. 2016; Riesenbergr et al. 2019) at two concentrations (300 nM and 900 nM). Importantly, cells  
150 constitutively expressing Cas9 were treated for an 18 hour time window, 4 hours after sgRNA expression  
151 plasmid delivery by transfection. Thus, DNA-PK was inhibited immediately before sgRNA expression. This  
152 resulted in improved deletion rates for all four sgRNA pairs, including a 17-fold increase for *PI*, which  
153 otherwise displays negligible deletion under normal conditions (Fig. 2C,E).

154 We next asked whether other inhibitors of DNA-PK yield a similar effect. We treated cells with four other  
155 commercially-available molecules at a concentration of 10uM: KU57788 ( $IC_{50}=14nM$ ), NU7026  
156 ( $IC_{50}=230nM$ ), LTURM34 ( $IC_{50}=34nM$ ) and DMNB ( $IC_{50}=15uM$ ) (Fig. 2F). Each one yielded increases in  
157 CRISPR-del efficiency to varying degrees, correlating with published differences on the inhibition potency  
158 (Mohiuddin and Kang 2019). As expected based on previous literature, KU57788 gave the strongest effect  
159 (Mohiuddin and Kang 2019) and DMNB gave the weakest effect, likely due to its high  $IC_{50}$ .

160 We were curious whether improved deletion depends on inhibition specifically of DNA-PK, or more  
161 generally on NHEJ. To answer this, we used SCR7 pyrazine to inhibit another step in NHEJ, the final ligation  
162 by Ligase IV (LigIV). In contrast to DNA-PK, this treatment did not improve deletion efficiency (Fig. 3A).  
163 At this late stage, the NHEJ machinery (DNA-end binding and processing complex) is already maintaining  
164 together the free DNA ends. When LigIV activity is restored, it may be more likely that each single DSB is  
165 repaired independently, introducing small indels rather than favouring genomic deletion. Thus, CRISPR-del  
166 efficiency improvements depend specifically on inhibition of DNA-PK activity. Altogether, we have shown  
167 that pharmacological inhibition of NHEJ at the DNA-PK step yields enhanced deletion of *PLXND1* reporter  
168 in HeLa cells.

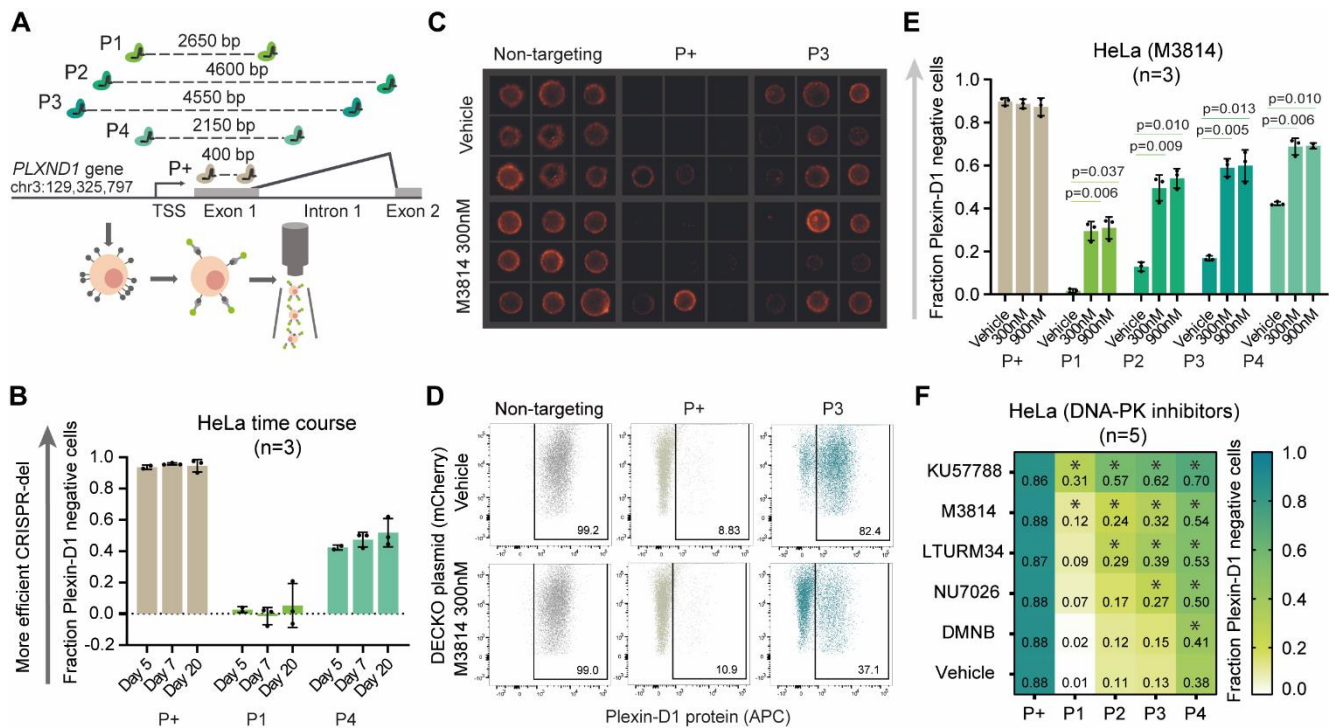

**Figure 2. CiDER reporter system identifies DNA-PK inhibition as a means to increase CRISPR-del efficiency.** (A) The CiDER endogenous reporter relies on a series of sgRNA pairs targeting exon 1 of *PLXND1* locus, whose protein product is read out by flow cytometry. (B) CRISPR-del efficiency time course in HeLa (mean, standard deviation). (C) Representative images of Plexin-D1 (APC) staining in HeLa. (D) Representative raw flow cytometry plots of CiDER in HeLa upon DNA-PK inhibition. Plexin-D1 positive cells are gated and numbers correspond to percentage of cells. (E) CRISPR-del efficiency of CiDER in HeLa upon DNA-PK inhibition (mean, standard deviation, 2-tailed paired *t*-test). (F) CRISPR-del efficiency of CiDER in HeLa upon DNA-PK inhibition with different small molecules (mean and 2-tailed paired *t*-test).

169

## 170 Generality of deletion enhancement by DNA-PK inhibition

171 We next assessed whether this DNA-PK-inhibition is more generally effective across cell lines, genomic  
172 targets and sgRNA delivery modalities.

173 We began by replicating CiDER experiments in two widely-used cell lines, HCT116 and HEK293T (Thomas  
174 et al. 2020; Li and Richard 2016; Hart et al. 2015; Liu et al. 2017) (Fig. 3B). Both have baseline CRISPR-  
175 del efficiency below HeLa, possibly due to weaker NHEJ activity (Miyaoaka et al. 2016). Nevertheless, DNA-  
176 PK inhibition enhanced deletion in both cell backgrounds.

177 All experiments so far involved a single target locus, assayed by flow cytometry. We next assessed whether  
178 these effects hold for other loci and readouts. We previously used a quantitative PCR method (quantitative  
179 CRISPR PCR, QC-PCR) to measure rates of deletion at the *MALAT1* enhancer region (Pulido-Quetglas et



180 al. 2017). For three out of four sgRNA pairs, we observed a significant enhancement of deletion with M3814  
181 treatment of HeLa (Fig. 3C, note the inverted scale used for QC-PCR). Similar but weaker results were also  
182 observed for HCT116 (two out of four pairs) and HEK293T cells (one out of four pairs) (Supplementary Fig.  
183 3).

184 Together, although differences in performance are observed between cell types, these findings support the  
185 general applicability of DNA-PK inhibition.

186

### 187 **DNA-PK inhibition in the context of high-throughput pooled screens**

188 CRISPR-del perturbations can be employed in the context of pooled functional screens, where libraries of  
189 paired sgRNAs are delivered by lentivirus at low MOI, and the effect on phenotypes such as proliferation are  
190 recorded. We asked whether DNA-PK inhibition is also practical under these conditions, by targeting the  
191 *PLXND1* reporter with sgRNAs delivered by low-MOI lentivirus. In initial experiments, M3814 was added  
192 to cell media prior to lentiviral transduction, but no improvement in deletion efficiency was observed (data  
193 not shown). This is explained by the fact that lentiviruses require NHEJ for genomic integration (Li et al.  
194 2001; Rene et al. 2004). Therefore, we modified our protocol so as to leave sufficient time for viral integration  
195 before NHEJ inhibition (24 h was optimal, Supplementary Fig. 4), and observed a 2.7-fold increase in  
196 CRISPR-del efficiency (Fig. 3D).

197 Pooled CRISPR screens employ phenotypic readouts, often in the form of cell proliferation (Esposito et al.  
198 2019; Doench 2017). To test whether improved CRISPR-del translates into stronger phenotypes, we  
199 developed a reporter assay capable of quantifying the phenotypic effect of CRISPR-del in terms of cell death.  
200 Analogous to *PLXND1* (Fig. 2A), we designed three pairs of sgRNAs targeting the first exon of the essential  
201 gene, *RPS5* (coding for the 40S ribosomal protein S5, P46782, Uniprot): *RPS5-P+*, *P9*, *P10*, *P11*. As  
202 expected, sgRNAs targeting the *AAVSI* locus had no effect, while sgRNAs targeting the *RPS5* ORF (*RPS5-*  
203 *P+*) resulted in ~47% mortality after 72 h (Fig. 3E). Neither was affected by M3814, indicating no detectable  
204 toxicity at this working concentration, as also shown by Riesenberget al (Riesenberget al. 2019). In contrast,  
205 three pairs of sgRNAs targeting the first exon of *RPS5* (*P9*, *P10*, *P11*) resulted in a substantial mortality

206 (32%, 21% and 15%, respectively), which was significantly enhanced by addition of M3814 (41%, 30% and  
 207 22%, respectively).

208 In conclusion, DNA-PK inhibition enhances CRISPR-del when sgRNAs are delivered lentivirally at low  
 209 MOI, and results in increased downstream phenotypic effects, supporting its utility in the context of high-  
 210 throughput pooled screens.

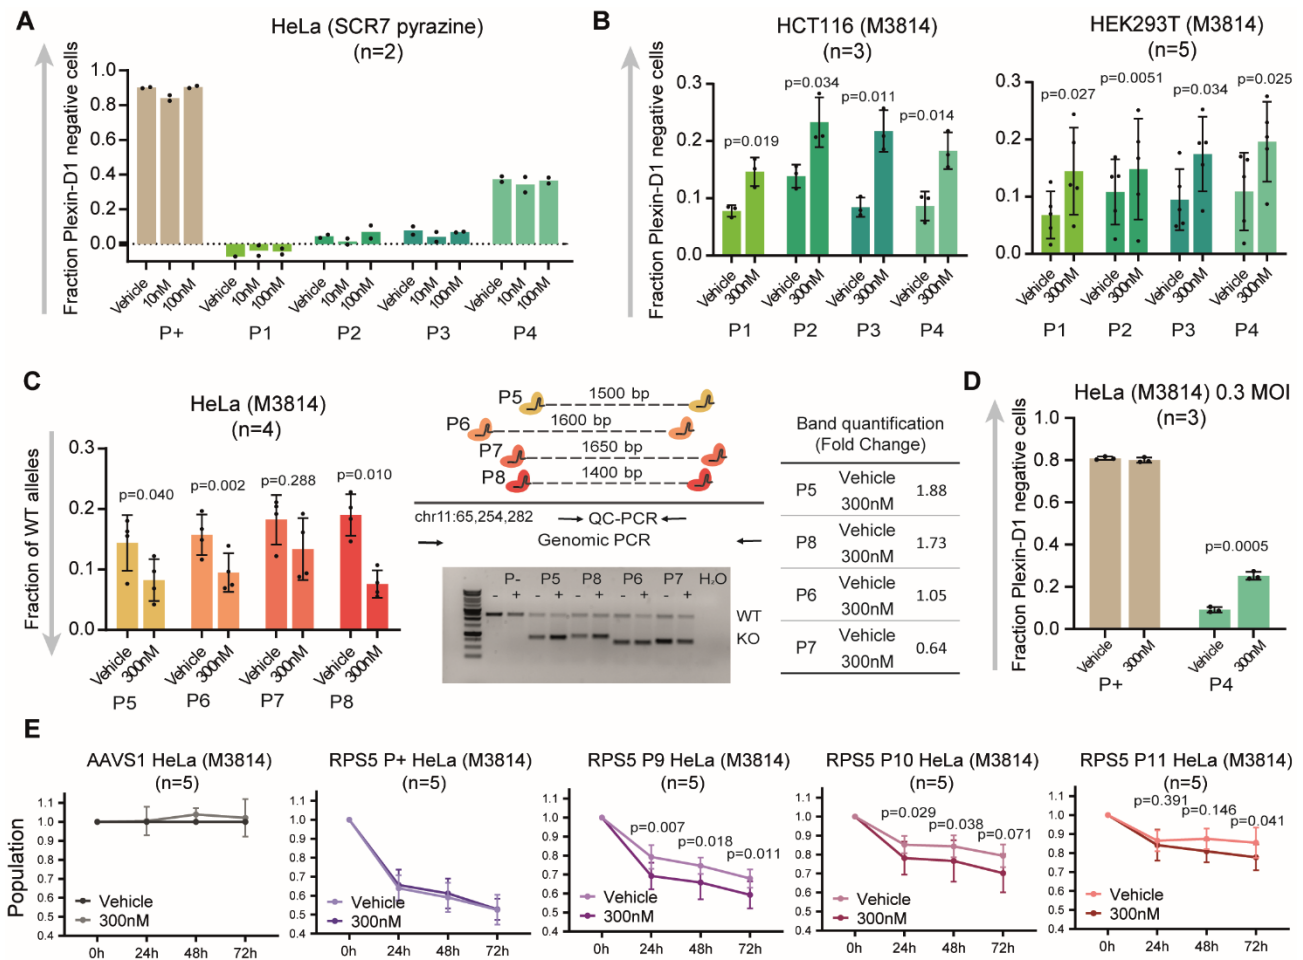

**Figure 3. Universality of DNA-PK inhibition.** (A) CRISPR-del efficiency of CiDER in HeLa upon LigIV inhibition (mean). (B) CRISPR-del efficiency of CiDER in HCT116 and HEK293T cell lines upon DNA-PK inhibition (mean, standard deviation, 2-tailed paired *t*-test). (C) CRISPR-del efficiency in chr11 locus in HeLa upon DNA-PK inhibition. The bar plots show the fraction of WT allele quantified by qPCR (mean, standard deviation, 2-tailed paired *t*-test). Shown a scheme of the sgRNA pairs and PCR primers design for this locus. Also shown a representative agarose gel from the genomic PCR of the region and band quantification of the KO allele. (D) CRISPR-del efficiency of CiDER in HeLa upon low MOI lentiviral infection and DNA-PK inhibition (mean, standard deviation, 2-tailed paired *t*-test). (E) Functional validation of DNA-PK inhibition. Viability assays after RPS5 TSS deletion upon DNA-PK inhibition (mean, standard deviation, 2-tailed paired *t*-test).

211

212

## 213 **Discussion**

214 The intrinsic DNA damage response underpins CRISPR-Cas9 genome editing and may be manipulated to  
215 favour desired editing outcomes. In the case of precise genome editing, which is based on the HDR pathway,  
216 efficiency has been substantially improved through pharmacological promotion of HDR and inhibition of the  
217 competing NHEJ pathway (Yeh et al. 2019). No such solutions have been developed for CRISPR-del, despite  
218 its being one of the most common CRISPR-Cas9 modalities, with diverse scientific and technological  
219 applications (Mochizuki et al. 2018; Holdt et al. 2016; Gasperini et al. 2019; Han et al. 2014; Ho et al. 2015;  
220 Canver et al. 2015; Koirala et al. 2017; Xing et al. 2017; Huang et al. 2018; Lupiañez et al. 2015; Nelson et  
221 al. 2016).

222 We hypothesised that successful CRISPR-del requires paired DSBs to co-occur *before* NHEJ has time to act,  
223 and thus may be enhanced by pharmacological inhibition of DNA-PK. This is initially counter-intuitive, as  
224 DNA-PK is a necessary step in the NHEJ pathway upon which CRISPR-del relies, and its inhibition is  
225 widely used to promote HDR (Yeh et al. 2019; Riesenbergs and Maricic 2018; Riesenbergs et al. 2019; Robert  
226 et al. 2015). However, rather than permanently blocking NHEJ, our protocol slows the kinetics of NHEJ for  
227 a defined period while DSBs are taking place. This produces a significant enhancement of DNA deletion  
228 efficiency, increasing protein knockout rates and resulting in stronger functional effects.

229 DNA-PK inhibition represents a practical option for a variety of CRISPR-del applications, from basic  
230 research to gene therapy. DNA-PK inhibitors are cheap and widely-available. Deletion efficiency improved  
231 regardless of the inhibitor molecule, target region, sgRNA sequence, cell background and delivery method.  
232 Particularly striking was the observation that some sgRNA pairs that are ineffective under normal conditions,  
233 achieved respectable rates of deletion using DNA-PK inhibition. This suggests that the failure of many  
234 sgRNA pairs to efficiently delete DNA may arise not from their inability to promote DSBs, but rather as a  
235 result of poor kinetic properties (for example, a mismatch in kinetics between the two individual sgRNAs).  
236 Finally, this method (with minor modifications) is compatible with low-MOI lentiviral delivery and leads to  
237 improvements in observed cell phenotypes. These conditions are employed in pooled screens to probe the  
238 functions of non-protein coding genomic elements (Zhu et al. 2016; Gasperini et al. 2017; Diao et al. 2017;  
239 Liu et al. 2018), meaning that DNA-PK inhibition may be used in future to improve the sensitivity of

240 CRISPR-deletion screens by boosting the number of active sgRNA pairs, and their efficiency. This study  
241 focussed on genetic delivery methods and transformed cell types that are commonly used in high-throughput  
242 screens. Nevertheless, it will be important to assess in future the performance of DNA-PK inhibition with  
243 Cas9 ribonucleoprotein (RNP) delivery methods and in primary and non-transformed cellular backgrounds.

244

245

## 246 **Materials and methods**

247

248 **Cell culture.** HeLa, HCT116 and HEK293T were cultured on Dulbecco's Modified Eagles Medium  
249 (DMEM) (Sigma-Aldrich, D5671) supplemented with 10% Fetal Bovine Serum (FBS) (ThermoFisher  
250 Scientific, 10500064), 1% L-Glutamine (ThermoFisher Scientific, 25030024), 1% Penicillin-Streptomycin  
251 (ThermoFisher Scientific, 15140122). Cells were grown at 37°C and 5% CO<sub>2</sub> and passaged every two days  
252 at 1:5 dilution.

253

254 **Generation of Cas9 stable cell lines.** HeLa cells were infected with lentivirus carrying the Cas9-BFP (blue  
255 fluorescent protein) vector (Addgene 52962). HCT116 and HEK293T were transfected with the same vector  
256 using Lipofectamine 2000 (ThermoFisher Scientific, 11668019). All cell types were selected with blasticidin  
257 (4ug/ml) for at least five days and selected for BFP-positive cells twice by fluorescence activated cell sorting.

258

259 **sgRNA pair design and cloning.** sgRNA pairs were designed using CRISPETa (<http://crispeta.crg.eu/>) and  
260 cloned into the pDECKO backbone as described previously (Pulido-Quetglas et al. 2017). Off-target filters  
261 did not allow less than 3 mismatches for each sgRNA sequence. No positive or negative masks were applied  
262 in the search. Minimum individual score was set at 0.2 and minimum paired score at 0.4. The sgRNA pairs  
263 were then manually selected from the output list. All sgRNA sequences may be found in Supplementary  
264 Figure 5.

265

266 **Inhibitors.** All molecules used in this study are commercially available: M3814 (MedChemExpress, HY-  
267 101570), KU57788 (MedChemExpress, HY-11006), NU7026 (MedChemExpress, HY-15719), LTURM34

268 (MedChemExpress, HY-101667), DMNB (ToChris, 2088) and SCR7 Pyrazine (Sigma-Aldrich, SML1546).  
269 10mM stocks (and 5mM for NU7026, due to solubility limitations) were prepared by resuspension in  
270 dimethylsulfoxide (DMSO) (Sigma-Aldrich, D4540).

271

272 **Transfection and lentiviral transduction.** For transfection experiments, 70% confluent 12-well plates were  
273 transfected using Lipofectamine 2000 (ThermoFisher Scientific, 11668019) with 1250 ng of pDECKO  
274 plasmid following provider's guidelines. After 6 hours, transfection media was replaced for fresh complete  
275 DMEM (10% FBS, 1% L-Glutamine and 1% Penicillin-Streptomycin) and the corresponding small molecule  
276 was added to media for 18 hours. The treatment was finished by replacing the media with complete DMEM.  
277 After one day cells were selected with puromycin (2ug/ml).

278 For lentiviral infection experiments, cells were spin-infected at a 0.3 multiplicity of infection in the presence  
279 of DMEM (10% FBS, 1% L-Glutamine) and hexadimethrine bromide (8ug/ml) (Sigma-Aldrich, 107689) at  
280 2000 rpm, 37°C during 1.5 hours. After 0, 5, 10, 24, 48, 72 hours, infection media was replaced for fresh  
281 complete DMEM (10% FBS, 1% L-Glutamine and 1% Penicillin-Streptomycin) and the corresponding small  
282 molecule was added to media for 18 hours. The treatment was finished by replacing the media with complete  
283 DMEM and puromycin (2ug/ml) to start the selection.

284

285 **Flow cytometry.** After five days of puromycin selection, cells were trypsinized, resuspended in PBS and  
286 incubated for 30 minutes at room temperature (RT) with the human  $\alpha$ -PlexinD1 mouse monoclonal antibody  
287 (1:150 dilution) (R&D systems, MAB4160). Cells were washed twice with PBS and incubated for 30 minutes  
288 at RT with an  $\alpha$ -Mouse IgG secondary goat antibody conjugated to the APC fluorochrome (1:200 dilution)  
289 (eBioscience, 17-4010-82). Cells were washed and resuspended in PBS, processed with the LSRII SORP  
290 flow cytometer and analysed with FlowJo\_v10 software. A total of 10,000 cells per sample are sorted. Cell  
291 population is selected in the SSC-A/FSC-A plot. Single cells are gated in the FSC-H/FSC-A plot. Finally,  
292 the APC positive population is set in the mCherry/APC plot in the control sample and expanded to all the  
293 other samples without modification. The fraction of Plexin-D1 negative singlet cells is calculated by gating  
294 Plexin-D1 positive singlet cells, normalizing to a non-targeting control and subtracting the value to 1  
295 (negative cells = 1 – positive cells). An example of the gating strategy may be found in Supplementary Figure  
296 6.

297 Single cell imaging was performed using ImageStream (Luminex) and analysed with IDEAS software.

298

299 **Genomic PCRs.** After 5 days of puromycin selection, cells were collected and genomic DNA (gDNA) was  
300 extracted using GeneJET Genomic DNA Purification Kit (ThermoFisher Scientific, K0722). Genomic PCR  
301 was performed using GoTaq® G2 DNA Polymerase (Promega, M7841) from 10ng gDNA (Forward: 5'  
302 *CCTGCTATGAACTGACCCATG* 3', Reverse: 5' *CCTGAACAGTCAGTCCATGCT* 3')

303

304 **Genomic quantitative PCRs.** After 5 days of puromycin selection, cells were collected and genomic DNA  
305 (gDNA) was extracted using GeneJET Genomic DNA Purification Kit (ThermoFisher Scientific, K0722).  
306 Quantitative real time PCR (qPCR) from 10ng of gDNA was performed using GoTaq qPCR Master Mix  
307 (Promega, A6001) on a TaqMan Viia 7 Real-Time PCR System. (Target sequence - Forward: 5'  
308 *GCTGGGGAATCCACAGAGAC* 3', Reverse: 5' *CATCTCAGCCCTTGTTATCCTG* 3') and (LDHA -  
309 Forward: 5' *TGGGCAGTAGAAAGTGCAG* 3', Reverse: 5' *TACCAGCTCCCACTCACAG* 3'). Target  
310 sequence primers were normalized to primers targeting the distal, non-targeted gene LDHA. Data were  
311 normalised using the  $\Delta\Delta C_t$  method (Schmittgen and Livak 2008).

312

313 **Cell viability assay.** CellTiter-Glo® 2.0 Cell Viability Assay (Promega, G9241) was performed upon  
314 puromycin selection (2 days post transfection). 3000 cells/well were seeded in 96-well white polystyrene  
315 plates (Corning®, Sigma-Aldrich CLS3610-48EA) and cell viability was measured in technical duplicates  
316 during 4 consecutive days (0h, 24h, 48h, 72h) according to the manufacturer's protocol. Luminescence was  
317 measured using a Tecan Reader Infinite 200.

318

319

## 320 **Acknowledgements**

321 We gratefully acknowledge administrative support from Ana Radovanovic and Silvia Roesselet (DBMR,  
322 University of Bern). We thank Bill Keyes (IGBMC) and Norbert Polacek (DCB, University of Bern) for  
323 insightful feedback and discussions. We also thank Stefan Müller (DBMR, University of Bern) for his  
324 expertise with ImageStream and the other members of the FACS lab from the University of Bern for their  
325 advice. We also acknowledge Taisia Polidori and Paulina Schaerer (DBMR, University of Bern) for the

326 experimental support, Álvaro Andrades (Universidad de Granada) for the CCLE data and the rest of the  
327 members of Johnson's lab for their valuable input. Andrea Maddalena (Department of Physiology, University  
328 of Bern) provided valuable advice regarding lentiviral transduction inhibition.

329

### 330 **Funding**

331 This work was funded by the Swiss National Science Foundation through the National Center of Competence  
332 in Research (NCCR) "RNA & Disease", by the Medical Faculty of the University and University Hospital  
333 of Bern, by the Helmut Horten Stiftung and Krebsliga Schweiz (4534-08-2018).

334

### 335 **Author contributions**

336 N.B. and R.J. conceived and designed the experiments. N.B. performed all the experiments and analysis of  
337 public data. M.M. and Y.Z. suggested DNA-PK inhibition to modulate NHEJ. C.P. contributed on the  
338 design of the sgRNA pairs and analysis of public data. R.E. provided the solution to circumvent lentiviral  
339 infection problems. N.B. and R.J. wrote the whole manuscript with feedback from M.M. and Y.Z. Finally,  
340 R.J. directed the research.

341

### 342 **Data availability**

343 The authors declare that all the data supporting the findings of this study are available within the paper and  
344 its supplementary information files.

345

### 346 **Ethics approval and consent to participate**

347 Not applicable.

348

### 349 **Competing interests**

350 The authors declare that they do not have competing interests.

351

352

353

354

355 **References**

356

357 Aparicio-Prat E, Arnan C, Sala I, Bosch N, Guigó R, Johnson R, Guigo R, Johnson R, Guigó R,

358 Johnson R, et al. 2015. DECKO: Single-oligo, dual-CRISPR deletion of genomic elements

359 including long non-coding RNAs. *BMC Genomics* **16**: 846.

360 <http://bmcgenomics.biomedcentral.com/articles/10.1186/s12864-015-2086-z> (Accessed March 13,

361 2018).

362 Barretina J, Caponigro G, Stransky N, Venkatesan K, Margolin AA, Kim S, Wilson CJ, Lehár J,

363 Kryukov G V., Sonkin D, et al. 2012. The Cancer Cell Line Encyclopedia enables predictive

364 modelling of anticancer drug sensitivity. *Nature* **483**: 603–607.

365 Bausch-Fluck D, Hofmann A, Bock T, Frei AP, Mirkowska P, Härtlová A, Eyk JE Van, Bourquin J.

366 2015. A Mass Spectrometric-Derived Cell Surface Protein Atlas. *PLoS One* 1–22.

367 Canver MC, Bauer DE, Dass A, Yien YY, Chung J, Masuda T, Maeda T, Paw BH, Orkin SH. 2014.

368 Characterization of genomic deletion efficiency mediated by CRISPR/Cas9 in mammalian cells. *J*

369 *Biol Chem* **289**: 21312–21324. <http://www.jbc.org/lookup/doi/10.1074/jbc.M114.564625>

370 (Accessed September 10, 2018).

371 Canver MC, Smith EC, Sher F, Pinello L, Sanjana NE, Shalem O, Chen DD, Schupp PG, Vinjamur DS,

372 Garcia SP, et al. 2015. BCL11A enhancer dissection by Cas9- mediated in situ saturating

373 mutagenesis. *Nature* **527**.

374 Chu VT, Weber T, Wefers B, Wurst W, Sander S, Rajewsky K, Kühn R. 2015. Increasing the efficiency

375 of homology-directed repair for CrIsPr-Cas9-induced precise gene editing in mammalian cells.

376 *Nat Biotechnol* **33**.

377 Cong L, Ran FA, Cox D, Lin S, Barretto R, Habib N, Hsu PD, Wu X, Jiang W, Marraffini LA, et al.

378 2013. Multiplex Genome Engineering Using CRISPR/Cas Systems. *Science* (80- ) 819–823.

379 <http://www.sciencemag.org/content/339/6121/819.full.html> (Accessed March 9, 2018).

380 Diao Y, Fang R, Li B, Meng Z, Yu J, Qiu Y, Lin KC, Huang H, Liu T, Marina RJ, et al. 2017. A tiling-

381 deletion-based genetic screen for cis - regulatory element identification in mammalian cells. *Nat*

382 *Methods* **14**.

383 Doench JG. 2017. Am I ready for CRISPR? A user’s guide to genetic screens. *Nat Rev Genet* **19**: 67–



- 384 80. <http://www.ncbi.nlm.nih.gov/pubmed/29199283> (Accessed February 20, 2018).
- 385 Doench JG. 2018. Am I ready for CRISPR? A user's guide to genetic screens. *Nat Rev Genet* **19**: 67–
- 386 80. <http://dx.doi.org/10.1038/nrg.2017.97>.
- 387 Doench JG, Fusi N, Sullender M, Hegde M, Vaimberg EW, Donovan KF, Smith I, Tothova Z, Wilen C,
- 388 Orchard R, et al. 2016. Optimized sgRNA design to maximize activity and minimize off-target
- 389 effects of CRISPR-Cas9. *Nat Biotechnol* **34**: 184–191. <http://www.nature.com/articles/nbt.3437>
- 390 (Accessed September 10, 2018).
- 391 Esposito R, Bosch N, Lanzós A, Polidori T, Pulido-Quetglas C, Johnson R. 2019. Hacking the Cancer
- 392 Genome: Profiling Therapeutically Actionable Long Non-coding RNAs Using CRISPR-Cas9
- 393 Screening. *Cancer Cell* **35**: 545–557.
- 394 Essletzbichler P, Konopka T, Santoro F, Chen D, Gapp B V, Kralovics R, Brummelkamp TR, Nijman
- 395 SMB. 2014. Megabase-scale deletion using CRISPR / Cas9 to generate a fully haploid human cell
- 396 line. *Genome Res* **24**: 2059–2065.
- 397 Fattah FJ, Lichter NF, Fattah KR, Oh S, Hendrickson EA. 2008. Ku70 , an essential gene , modulates
- 398 the frequency of rAAV-mediated gene targeting in human somatic cells. *PNAS* **105**: 8703–8708.
- 399 Fuchss T, Emde U, Buchstaller H-P, W.K.R. WM. 2014. WO2014183850A1.
- 400 Gasperini M, Findlay GM, McKenna A, Milbank JH, Lee C, Zhang MD, Cusanovich DA, Shendure J.
- 401 2017. CRISPR/Cas9-Mediated Scanning for Regulatory Elements Required for HPRT1
- 402 Expression via Thousands of Large, Programmed Genomic Deletions. *Am J Hum Genet*.
- 403 <http://www.sciencedirect.com/science/article/pii/S0002929717302458> (Accessed July 18, 2017).
- 404 Gasperini M, Hill AJ, Trapnell C, Ahituv N, Martin B, Kim S, Zhang MD, Jackson D, Leith A,
- 405 Schreiber J, et al. 2019. A Genome-wide Framework for Mapping Gene Regulation via Cellular
- 406 Genetic Screens. *Cell* **176**: 377–390.
- 407 Han J, Zhang J, Chen L, Shen B, Zhou J, Hu B, Du Y, Tate PH, Huang X, Zhang W. 2014. Efficient in
- 408 vivo deletion of a large imprinted lncRNA by CRISPR/Cas9. *RNA Biol* **11**: 829–35.
- 409 <http://www.ncbi.nlm.nih.gov/pubmed/25137067> (Accessed May 11, 2017).
- 410 Harnor SJ, Brennan A, Cano C. 2017. Targeting DNA-Dependent Protein Kinase for Cancer Therapy.
- 411 *ChemMedChem* **12**: 895–900.
- 412 Hart T, Chandrashekhar M, Aregger M, Durocher D, Steinhart Z, Brown KR, Macleod G, Mis M,

- 413 Zimmermann M, Fradet-Turcotte A, et al. 2015. High-Resolution CRISPR Screens Reveal Fitness  
414 Genes and Genotype-Specific Cancer Liabilities. <http://dx.doi.org/10.1016/j.cell.2015.11.015>  
415 (Accessed March 19, 2018).
- 416 Ho T-T, Zhou N, Huang J, Koirala P, Xu M, Fung R, Wu F, Mo Y-Y. 2015. Targeting non-coding  
417 RNAs with the CRISPR/Cas9 system in human cell lines. *Nucleic Acids Res* **43**: e17.  
418 [http://academic.oup.com/nar/article/43/3/e17/2410995/Targeting-noncoding-RNAs-with-the-](http://academic.oup.com/nar/article/43/3/e17/2410995/Targeting-noncoding-RNAs-with-the-CRISPR-Cas9)  
419 [CRISPRCas9](http://academic.oup.com/nar/article/43/3/e17/2410995/Targeting-noncoding-RNAs-with-the-CRISPR-Cas9) (Accessed September 10, 2018).
- 420 Holdt LM, Stahring A, Sass K, Pichler G, Kulak NA, Wilfert W, Kohlmaier A, Herbst A, Northoff  
421 BH, Nicolaou A, et al. 2016. Circular non-coding RNA ANRIL modulates ribosomal RNA  
422 maturation and atherosclerosis in humans. *Nat Commun* **7**.
- 423 Huang J, Li K, Cai W, Liu X, Zhang Y, Orkin SH, Xu J, Yuan G. 2018. Dissecting super-enhancer  
424 hierarchy based on chromatin interactions. *Nat Commun* **9**.
- 425 Koirala P, Huang J, Ho T-T, Wu F, Ding X, Mo Y-Y. 2017. LncRNA AK023948 is a positive regulator  
426 of AKT. *Nat Commun* **8**: 14422. <http://www.nature.com/doifinder/10.1038/ncomms14422>  
427 (Accessed March 28, 2018).
- 428 Kosicki M, Tomberg K, Bradley A. 2018. Repair of double-strand breaks induced by CRISPR – Cas9  
429 leads to large deletions and complex rearrangements. *Nat Biotechnol* **36**.
- 430 Li L, Olvera JM, Yoder KE, Mitchell RS, Butler SL, Lieber M, Martin SL, Bushman FD. 2001. Role of  
431 the non-homologous DNA end joining pathway in the early steps of retroviral infection. *EMBO J*  
432 **20**.
- 433 Li N, Richard S. 2016. Sam68 functions as a transcriptional coactivator of the p53 tumor suppressor.  
434 *Nucleic Acids Res* 1–16.
- 435 Lin S, Staahl BT, Alla RK, Doudna JA. 2014. Enhanced homology-directed human genome engineering  
436 by controlled timing of CRISPR / Cas9 delivery. *Elife* 1–13.
- 437 Liu SJ, Horlbeck MA, Cho SW, Birk HS, Malatesta M, He D, Attenello FJ, Villalta JE, Cho MY, Chen  
438 Y, et al. 2017. CRISPRi-based genome-scale identification of functional long noncoding RNA loci  
439 in human cells. *Science (80- )* **355**: eaah7111.  
440 <http://www.sciencemag.org/lookup/doi/10.1126/science.aah7111> (Accessed April 25, 2017).
- 441 Liu Y, Cao Z, Wang Y, Guo Y, Xu P, Yuan P, Liu Z. 2018. Genome-wide screening for functional long

- 442 noncoding RNAs in human cells by Cas9 targeting of splice sites. *Nat Biotechnol* **36**.
- 443 Luo B, Cheung HW, Subramanian A, Sharifnia T, Okamoto M, Yang X, Hinkle G, Boehm JS,  
444 Beroukhim R, Weir BA, et al. 2008. Highly parallel identification of essential genes in cancer  
445 cells. *PNAS* **105**: 20380–5. <http://www.pnas.org/content/105/51/20380.full> (Accessed December  
446 5, 2015).
- 447 Lupiáñez DG, Kraft K, Heinrich V, Krawitz P, Visel A, Mundlos S. 2015. Disruptions of Topological  
448 Chromatin Domains Cause Pathogenic Rewiring of Gene-Enhancer Interactions. *Cell* **161**: 1012–  
449 1025.
- 450 Maddalo D, Manchado E, Concepcion CP, Bonetti C, Vidigal JA, Han Y, Ogradowski P, Crippa A,  
451 Rekhtman N, Stanchina E De, et al. 2014. In vivo engineering of oncogenic chromosomal  
452 rearrangements with the CRISPR/Cas9 system Danilo. *Nature* **516**.
- 453 Mali P, Yang L, Esvelt KM, Aach J, Guell M, DiCarlo JE, Norville JE, George M. Church. 2013. RNA-  
454 Guided Human Genome Engineering via Cas9. *Science* **339**: 823–827.
- 455 Mandal PK, Ferreira MR, Collins R, Meissner TB, Boutwell CL, Rossi DJ, Cowan CA, Ferreira LMR.  
456 2014. Efficient Ablation of Genes in Human Hematopoietic Stem and Effector Cells using  
457 CRISPR/Cas9. *Cell Stem Cell* **15**: 643–652. <http://dx.doi.org/10.1016/j.stem.2014.10.004>.
- 458 Mangeot PE, Risson V, Fusil F, Marnef A, Laurent E, Blin J, Mournetas V, Massouridès E, Sohier  
459 TJM, Corbin A, et al. 2019. Genome editing in primary cells and in vivo using viral-derived  
460 Nanoblades loaded with Cas9-sgRNA ribonucleoproteins. *Nat Commun* **10**: 1–15.  
461 <http://dx.doi.org/10.1038/s41467-018-07845-z>.
- 462 Mao Z, Bozzella M, Seluanov A, Gorbunova V. 2008. Comparison of nonhomologous end joining and  
463 homologous recombination in human cells. *DNA Repair (Amst)* **7**: 1765–1771.
- 464 Maruyama T, Dougan SK, Truttmann MC, Bilate AM, Ingram JR, Ploegh HL. 2015. Increasing the  
465 efficiency of precise genome editing with CrIsPr-Cas9 by inhibition of nonhomologous end  
466 joining. *Nat Biotechnol* **33**: 1–9.
- 467 Meyers RM, Bryan JG, McFarland JM, Weir BA, Sizemore AE, Xu H, Dharia N V., Montgomery PG,  
468 Cowley GS, Pantel S, et al. 2017. Computational correction of copy number effect improves  
469 specificity of CRISPR-Cas9 essentiality screens in cancer cells. *Nat Genet* **49**: 1779–1784.
- 470 Miyaoka Y, Berman JR, Cooper SB, Mayerl SJ, Chan AH, Zhang B, Karlin-neumann GA, Conklin BR.

- 471 2016. Systematic quantification of HDR and NHEJ reveals effects of locus, nuclease, and cell type  
472 on genome- editing. *Sci Rep* 1–12. <http://dx.doi.org/10.1038/srep23549>.
- 473 Mochizuki Y, Chiba T, Kataoka K, Yamashita S, Sato T, Kato T. 2018. Combinatorial CRISPR/Cas9  
474 Approach to Elucidate a Far-Upstream Enhancer Complex for Tissue- Specific Sox9 Expression.  
475 *Dev Cell* **46**: 794-806.e6. <https://doi.org/10.1016/j.devcel.2018.07.024>.
- 476 Mohiuddin IS, Kang MH. 2019. DNA-PK as an Emerging Therapeutic Target in Cancer. **9**: 1–8.
- 477 Nelson CE, Hakim CH, Ousterout DG, Thakore PI, Moreb EA, Rivera RMC, Madhavan S, Pan X, Ran  
478 FA, Yan WX, et al. 2016. In vivo genome editing improves muscle function in a mouse model of  
479 Duchenne muscular dystrophy. **351**: 403–408.
- 480 Pulido-Quetglas C, Aparicio-Prat E, Arnan C, Polidori T, Hermoso T, Palumbo E, Ponomarenko J,  
481 Guigo R, Johnson R. 2017. Scalable Design of Paired CRISPR Guide RNAs for Genomic  
482 Deletion. *PLOS Comput Biol* **13**: e1005341. <http://dx.doi.org/10.1371/journal.pcbi.1005341>.
- 483 Rene D, Greger JG, Katz RA, Taganov KD, Wu X, Kappes JC, Skalka AM. 2004. Evidence that Stable  
484 Retroviral Transduction and Cell Survival following DNA Integration Depend on Components of  
485 the Nonhomologous End Joining Repair Pathway. *J Virol* **78**: 8573–8581.
- 486 Riesenbergs S, Chintalapati M, Macak D, Kanis P. 2019. Simultaneous precise editing of multiple genes  
487 in human cells. *Nucleic Acids Res* **47**.
- 488 Riesenbergs S, Maricic T. 2018. Targeting repair pathways with small molecules increases precise  
489 genome editing in pluripotent stem cells. *Nat Commun* **9**: 1–9. [http://dx.doi.org/10.1038/s41467-](http://dx.doi.org/10.1038/s41467-018-04609-7)  
490 [018-04609-7](http://dx.doi.org/10.1038/s41467-018-04609-7).
- 491 Robert F, Barbeau M, Éthier S, Dostie J, Pelletier J. 2015. Pharmacological inhibition of DNA-PK  
492 stimulates Cas9-mediated genome editing. *Genome Med* 1–11. [http://dx.doi.org/10.1186/s13073-](http://dx.doi.org/10.1186/s13073-015-0215-6)  
493 [015-0215-6](http://dx.doi.org/10.1186/s13073-015-0215-6).
- 494 Sanson KR, Hanna RE, Hegde M, Donovan KF, Strand C, Sullender ME, Vaimberg EW, Goodale A,  
495 Root DE, Piccioni F, et al. 2018. Optimized libraries for CRISPR-Cas9 genetic screens with  
496 multiple modalities. *Nat Commun* **9**: 5416. <http://www.nature.com/articles/s41467-018-07901-8>  
497 (Accessed May 15, 2019).
- 498 Schmittgen TD, Livak KJ. 2008. Analyzing real-time PCR data by the comparative CT method. *Nat*  
499 *Protoc* **3**: 1101–1108.

- 500 Song J, Yang D, Xu J, Zhu T, Chen YE, Zhang J. 2016. RS-1 enhances CRISPR/Cas9- and TALEN-  
501 mediated knock-in efficiency. *Nat Commun* **7**.
- 502 Stojic L, Lun ATLL, Mangei J, Mascalchi P, Quarantotti V, Barr AR, Bakal C, Marioni JC, Gergely F,  
503 Odom DT. 2018. Specificity of RNAi, LNA and CRISPRi as loss-of-function methods in  
504 transcriptional analysis. *Nucleic Acids Res* **46**: 5950–5966.  
505 <http://www.ncbi.nlm.nih.gov/pubmed/29860520> (Accessed July 29, 2018).
- 506 Thomas JD, Polaski JT, Feng Q, De Neef EJ, Hoppe ER, McSharry M V, Pangallo J, Gabel AM,  
507 Belleville AE, Watson J, et al. 2020. RNA isoform screens uncover the essentiality and tumor-  
508 suppressor activity of ultraconserved poison exons. *Nat Genet* **52**.  
509 <http://www.ncbi.nlm.nih.gov/pubmed/31911676>.
- 510 Thul PJ, Åkesson L, Wiking M, Mahdessian D, Geladaki A, Ait Blal H, Alm T, Asplund A, Björk L,  
511 Breckels LM, et al. 2017. A subcellular map of the human proteome. *Science (80- )* **356**: eaal3321.  
512 <http://www.ncbi.nlm.nih.gov/pubmed/28495876> (Accessed March 11, 2018).
- 513 Tsherniak A, Vazquez F, Montgomery PG, Weir BA, Kryukov G, Cowley GS, Gill S, Harrington WF,  
514 Pantel S, Krill-Burger JM, et al. 2017. Defining a Cancer Dependency Map. *Cell* **170**: 564-  
515 576.e16. <http://dx.doi.org/10.1016/j.cell.2017.06.010>.
- 516 Vidigal JA, Ventura A. 2015. Rapid and efficient one-step generation of paired gRNA CRISPR-Cas9  
517 libraries. *Nat Commun* **6**: 1–7.
- 518 Xing Y-H, Yao R-W, Zhang Y, Guo C-J, Jiang S, Xu G, Dong R, Yang L, Chen L-L. 2017. SLERT  
519 Regulates DDX21 Rings Associated with Pol I Transcription. *Cell* **169**: 664-670.e16.  
520 <http://dx.doi.org/10.1016/j.cell.2017.04.011>.
- 521 Yang H, Wang H, Shivalila CS, Cheng AW, Shi L, Jaenisch R. 2013. One-Step Generation of Mice  
522 Carrying Reporter and Conditional Alleles by CRISPR/Cas-Mediated Genome Engineering. *Cell*  
523 **154**: 1370–1379. <http://dx.doi.org/10.1016/j.cell.2013.08.022>.
- 524 Yeh CD, Richardson CD, Corn JE. 2019. Advances in genome editing through control of DNA repair  
525 pathways. *Nat Cell Biol* **21**. <http://dx.doi.org/10.1038/s41556-019-0425-z>.
- 526 Zenke FT, Zimmermann A, Sirrenberg C, Dahmen H, Vassilev L, Pehl U, Fuchss T, Blaukat A. 2016.  
527 Abstract 1658: M3814, a novel investigational DNA-PK inhibitor: enhancing the effect of  
528 fractionated radiotherapy leading to complete regression of tumors in mice. In *Proceedings of the*

- 529 *108th Annual Meeting of the American Association for Cancer Research.*
- 530 Zhu S, Li W, Liu J, Chen C-H, Liao Q, Xu P, Xu H, Xiao T, Cao Z, Peng J, et al. 2016. Genome-scale  
531 deletion screening of human long non-coding RNAs using a paired-guide RNA CRISPR–Cas9  
532 library. *Nat Biotechnol* **34**: 1279–1286. <http://www.nature.com/doifinder/10.1038/nbt.3715>  
533 (Accessed December 21, 2016).
